# Supplementary material for: mpg-C3N4 as a solid base catalyst for Knoevenagel condensations and transesterification reactions
Source: Royal Society of Chemistry journal article supplement (doi:10.1039/c2cy00012a), 2012-01-01
Supplement: c2cy00012a.pdf [file c2cy00012a.pdf]

# mpg-C<sub>3</sub>N<sub>4</sub> as a Solid Base Catalyst for Knoevenagel Condensations and Transesterification Reactions

Fangzheng Su,<sup>\*a</sup> Markus Antonietti<sup>a</sup> and Xinchen Wang<sup>\*b</sup>

<sup>a</sup>Max Planck Institute of Colloids and Interfaces, Research Campus Golm, D-14476 Golm, Potsdam, Germany

<sup>b</sup>Research Institute of Photocatalysis, State Key Laboratory Breeding Base of Photocatalysis, Fuzhou University, Fuzhou 350002 (P. R. China).

## Electronic Supplementary Information

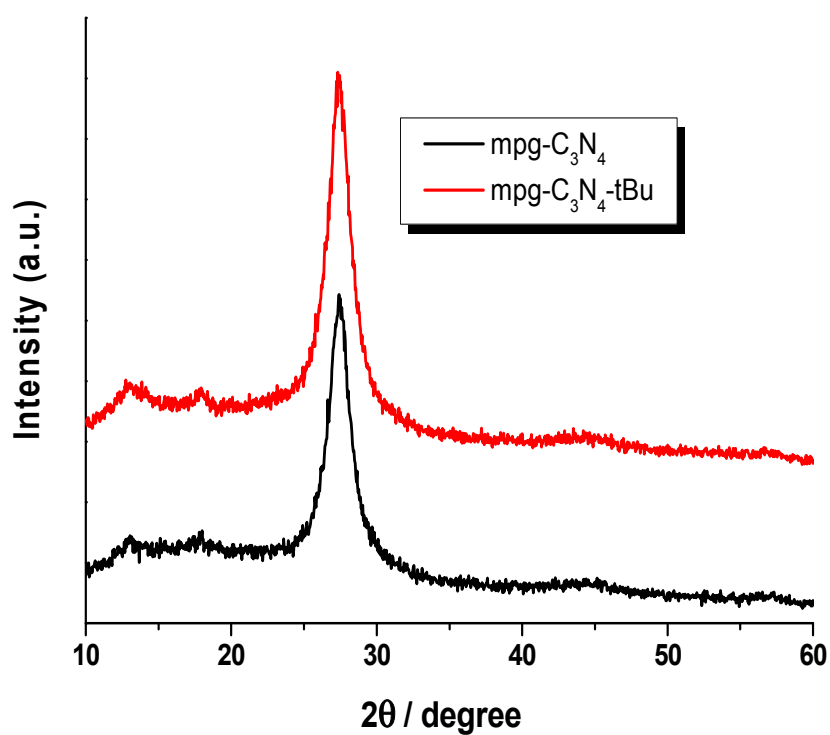

**Figure S1:** XRD patterns of mpg-C<sub>3</sub>N<sub>4</sub> and mpg-C<sub>3</sub>N<sub>4</sub>-tBu
